# Supplementary material
Source: PubMed Central journal article supplement (PMC8847310)
Supplement: NIHMS1732063-supplement-1732063_Reporting_summary.pdf [file NIHMS1732063-supplement-1732063_Reporting_summary.pdf]

## Reporting Summary

Nature Research wishes to improve the reproducibility of the work that we publish. This form provides structure for consistency and transparency in reporting. For further information on Nature Research policies, see our [Editorial Policies](#) and the [Editorial Policy Checklist](#).

### Statistics

For all statistical analyses, confirm that the following items are present in the figure legend, table legend, main text, or Methods section.

n/a Confirmed

- The exact sample size ( $n$ ) for each experimental group/condition, given as a discrete number and unit of measurement
- A statement on whether measurements were taken from distinct samples or whether the same sample was measured repeatedly
- The statistical test(s) used AND whether they are one- or two-sided  
*Only common tests should be described solely by name; describe more complex techniques in the Methods section.*
- A description of all covariates tested
- A description of any assumptions or corrections, such as tests of normality and adjustment for multiple comparisons
- A full description of the statistical parameters including central tendency (e.g. means) or other basic estimates (e.g. regression coefficient) AND variation (e.g. standard deviation) or associated estimates of uncertainty (e.g. confidence intervals)
- For null hypothesis testing, the test statistic (e.g.  $F$ ,  $t$ ,  $r$ ) with confidence intervals, effect sizes, degrees of freedom and  $P$  value noted  
*Give  $P$  values as exact values whenever suitable.*
- For Bayesian analysis, information on the choice of priors and Markov chain Monte Carlo settings
- For hierarchical and complex designs, identification of the appropriate level for tests and full reporting of outcomes
- Estimates of effect sizes (e.g. Cohen's  $d$ , Pearson's  $r$ ), indicating how they were calculated

*Our web collection on [statistics for biologists](#) contains articles on many of the points above.*

### Software and code

Policy information about [availability of computer code](#)

Data collection

Data analysis

For manuscripts utilizing custom algorithms or software that are central to the research but not yet described in published literature, software must be made available to editors and reviewers. We strongly encourage code deposition in a community repository (e.g. GitHub). See the Nature Research [guidelines for submitting code & software](#) for further information.

### Data

Policy information about [availability of data](#)

All manuscripts must include a [data availability statement](#). This statement should provide the following information, where applicable:

- Accession codes, unique identifiers, or web links for publicly available datasets
- A list of figures that have associated raw data
- A description of any restrictions on data availability

A reporting summary for this article is available as a Supplementary Information file. The raw gel images underlying Figs. 1c-d, 2b-c, 2f-g, 3d,4f and Supplementary Figs. 2d-e, 3a-b, 3e-f, 4a-b are provided as a Source Data File and an additional supplementary data file, respectively. NCBI Clinvar database is accessible through the indicated link: <https://www.ncbi.nlm.nih.gov/clinvar/>. The raw DNA sequencing data are available at the NCBI Sequence Read Archive database under PRJNA746292 and PRJNA746489.

## Field-specific reporting

Please select the one below that is the best fit for your research. If you are not sure, read the appropriate sections before making your selection.

- Life sciences       Behavioural & social sciences       Ecological, evolutionary & environmental sciences

For a reference copy of the document with all sections, see [nature.com/documents/nr-reporting-summary-flat.pdf](https://www.nature.com/documents/nr-reporting-summary-flat.pdf)

## Life sciences study design

All studies must disclose on these points even when the disclosure is negative.

|                 |                                                                                                                                                                                                                                                                                                                                                                                                                                                                                                                                                                                                                      |
|-----------------|----------------------------------------------------------------------------------------------------------------------------------------------------------------------------------------------------------------------------------------------------------------------------------------------------------------------------------------------------------------------------------------------------------------------------------------------------------------------------------------------------------------------------------------------------------------------------------------------------------------------|
| Sample size     | 2x10 <sup>5</sup> cells were used for editing in culture system. All cell samples were evaluated in at least biological triplicates (n = 3) to ensure the reproductability. Our previous editing studies have shown that this sample size and replications are sufficient to ensure reproducibility (Song et al, Nature Biomedical Engineering, 2019 and Jiang et al, Nature Communications, 2020). For animal experiment, we described the size in the specific figure legend. The size is determined based on the availability of the mice and previous reports (Song et al, Nature Biomedical Engineering, 2019). |
| Data exclusions | No data was excluded.                                                                                                                                                                                                                                                                                                                                                                                                                                                                                                                                                                                                |
| Replication     | All the culture-related experiments were done in biological triplicate in culture cells, n=3, on different days (every three days). All attempts at replication were successful, and standard deviations were in the expected ranges.                                                                                                                                                                                                                                                                                                                                                                                |
| Randomization   | After seeding cell into 12-well plate, we randomly decided which cells are for experiment group or control group. For mouse experiment, we randomly decide the mice treated for Cas9 or PE-Cas9 and for short or long-term studies.                                                                                                                                                                                                                                                                                                                                                                                  |
| Blinding        | It is not applied to molecular and cell experiments. All mouse work are blind.                                                                                                                                                                                                                                                                                                                                                                                                                                                                                                                                       |

## Reporting for specific materials, systems and methods

We require information from authors about some types of materials, experimental systems and methods used in many studies. Here, indicate whether each material, system or method listed is relevant to your study. If you are not sure if a list item applies to your research, read the appropriate section before selecting a response.

### Materials & experimental systems

| n/a                                 | Involved in the study                                           |
|-------------------------------------|-----------------------------------------------------------------|
| <input type="checkbox"/>            | <input checked="" type="checkbox"/> Antibodies                  |
| <input type="checkbox"/>            | <input checked="" type="checkbox"/> Eukaryotic cell lines       |
| <input checked="" type="checkbox"/> | <input type="checkbox"/> Palaeontology and archaeology          |
| <input type="checkbox"/>            | <input checked="" type="checkbox"/> Animals and other organisms |
| <input checked="" type="checkbox"/> | <input type="checkbox"/> Human research participants            |
| <input checked="" type="checkbox"/> | <input type="checkbox"/> Clinical data                          |
| <input checked="" type="checkbox"/> | <input type="checkbox"/> Dual use research of concern           |

### Methods

| n/a                                 | Involved in the study                              |
|-------------------------------------|----------------------------------------------------|
| <input checked="" type="checkbox"/> | <input type="checkbox"/> ChIP-seq                  |
| <input type="checkbox"/>            | <input checked="" type="checkbox"/> Flow cytometry |
| <input checked="" type="checkbox"/> | <input type="checkbox"/> MRI-based neuroimaging    |

## Antibodies

|                 |                                                                                                           |
|-----------------|-----------------------------------------------------------------------------------------------------------|
| Antibodies used | Fumarylacetoacetate hydrolase antibody (ab83770, Abcam Inc), IHC 1:400                                    |
| Validation      | The specificity of the anti-Fah antibody has previously been confirmed (Yin et al, Nature Biotech, 2016). |

## Eukaryotic cell lines

Policy information about [cell lines](#)

|                                                                   |                                                                                                                                                                                                                              |
|-------------------------------------------------------------------|------------------------------------------------------------------------------------------------------------------------------------------------------------------------------------------------------------------------------|
| Cell line source(s)                                               | HEK293T cells and HEK293T-TLR cells                                                                                                                                                                                          |
| Authentication                                                    | HEK293T (ATCC) cells were valiated by supplier (ATCC) by STR analysis. And HEK293T-TLR cells were valiated using specific primers to amplify the inserted cassette. And the PCR products were analyzed by Sanger Sequencing. |
| Mycoplasma contamination                                          | All cell lines tested negative for mycoplasma contamination                                                                                                                                                                  |
| Commonly misidentified lines (See <a href="#">ICLAC</a> register) | The cell lines used in this article are not in the list of misidentified lines.                                                                                                                                              |

## Animals and other organisms

Policy information about [studies involving animals](#); [ARRIVE guidelines](#) recommended for reporting animal research

|                         |                                                                                                                                                                                                                         |
|-------------------------|-------------------------------------------------------------------------------------------------------------------------------------------------------------------------------------------------------------------------|
| Laboratory animals      | FahΔExon5 mice was a mouse model of tyrosinemia. 9-week-old female mice were used in this study. Temperature of 65-75°F (~18-23°C) with 40-60% humidity are kept in the mouse room. A 14-hour light/10-hour dark cycle. |
| Wild animals            | No wild animals were used in the study.                                                                                                                                                                                 |
| Field-collected samples | No field-collected samples were used in the study                                                                                                                                                                       |
| Ethics oversight        | All animal study protocols were approved by the UMass IACUC.                                                                                                                                                            |

Note that full information on the approval of the study protocol must also be provided in the manuscript.

## Flow Cytometry

### Plots

Confirm that:

- The axis labels state the marker and fluorochrome used (e.g. CD4-FITC).
- The axis scales are clearly visible. Include numbers along axes only for bottom left plot of group (a 'group' is an analysis of identical markers).
- All plots are contour plots with outliers or pseudocolor plots.
- A numerical value for number of cells or percentage (with statistics) is provided.

### Methodology

|                           |                                                                                                                                                                            |
|---------------------------|----------------------------------------------------------------------------------------------------------------------------------------------------------------------------|
| Sample preparation        | Post-editing HEK293T-TLR cells were trypsinized, resuspended in 200ul PBS with 1% FBS, and directly analyzed by flow cytometry.                                            |
| Instrument                | mCherry analysis is analyzed by MACSQuant VYB Flow Cytometer. Sorting of mCherry positive cells was performed by BD FACS-Aira II.                                          |
| Software                  | All data were analyzed by FlowJo10.0 software                                                                                                                              |
| Cell population abundance | mCherry positive rates w=mCherry positive cell number / total live cell number                                                                                             |
| Gating strategy           | The cells were first gated based on FSC/SSC and FSCA/FSCH to select for live single cells. Unedited TLR cells were employed as negative control for gating mCherry signal. |

- Tick this box to confirm that a figure exemplifying the gating strategy is provided in the Supplementary Information.
