# Supplementary material
Source: PubMed Central journal article supplement (PMC8847310)

**Fig2b**

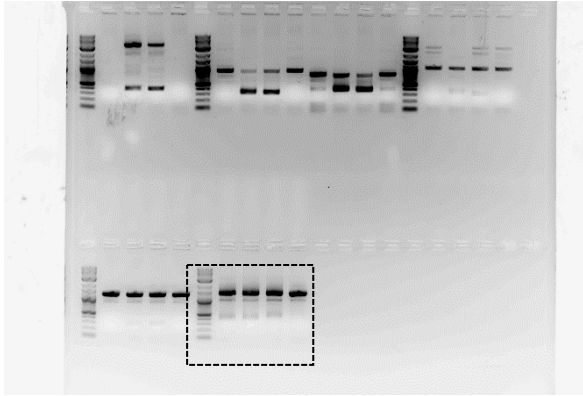

**Fig2c**

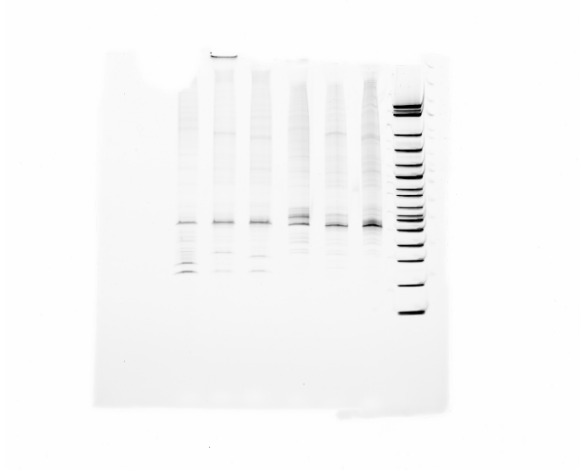

**Fig2f**

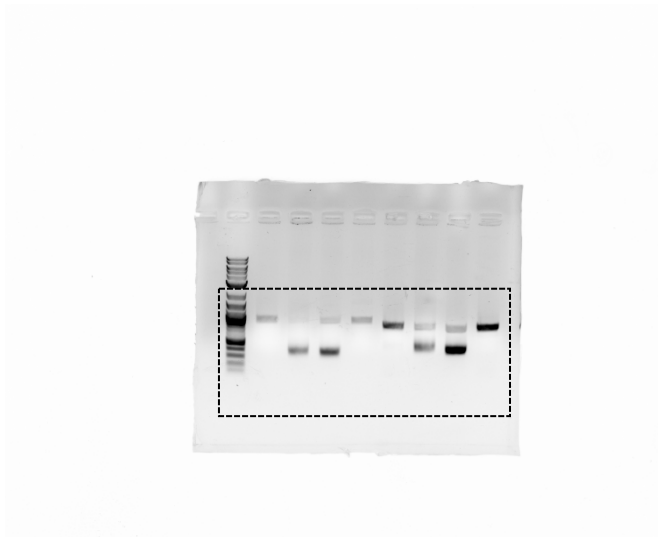

**Fig2g**

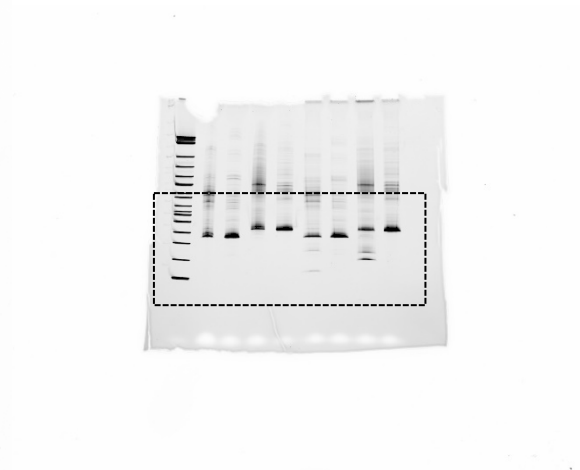

Supplement: NIHMS1732063-supplement-1732063_SD_fig2.pdf [file NIHMS1732063-supplement-1732063_SD_fig2.pdf]
